# Supplementary material for: Evaluation of Anticonvulsant, Sedative, Anxiolytic, and Phytochemical Profile of the Methanol Extract from the Aerial Parts of Swertia corymbosa (Griseb.) Wight ex C.B. Clarke
Source: PubMed Central journal article supplement (PMC4022199; doi:10.1155/2014/542385), 2014-04-27
Supplement: 542385.f1.pdf [file 542385.f1.pdf]

## Supplementary Information

Evaluation of anticonvulsant, sedative, anxiolytic and phytochemical profile of the methanol extract from the aerial parts of *Swertia corymbosa* (Griseb.) Wight ex C.B. Clarke

G. Mahendran <sup>a\*</sup>, G. Thamocharan <sup>b</sup>, S. Sengottuvelu <sup>b</sup>, V. Narmatha Bai <sup>a</sup>

### Supplementary figures

Swertianin-H-NMR

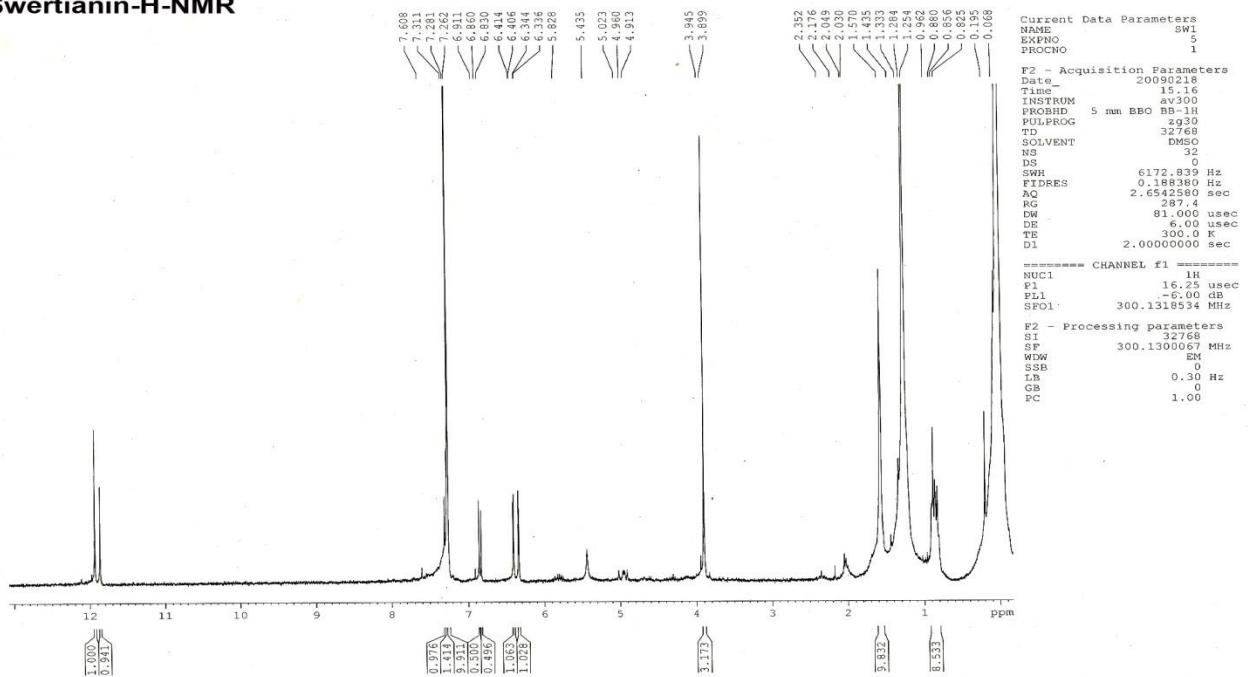

$^{13}\text{C}$ -NMR spectra of swertianin

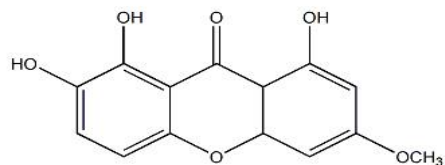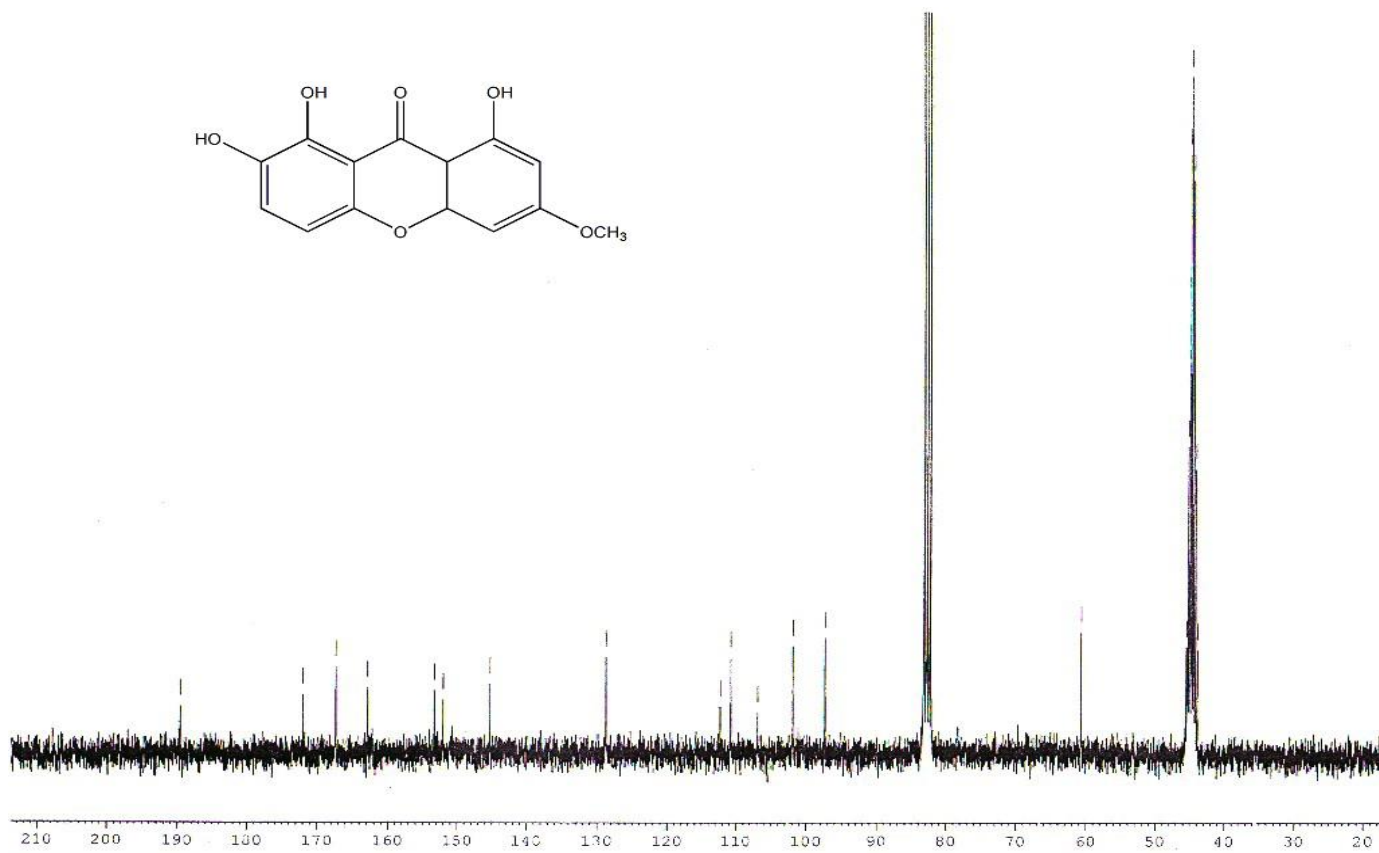

# HMBC spectra of swertianin

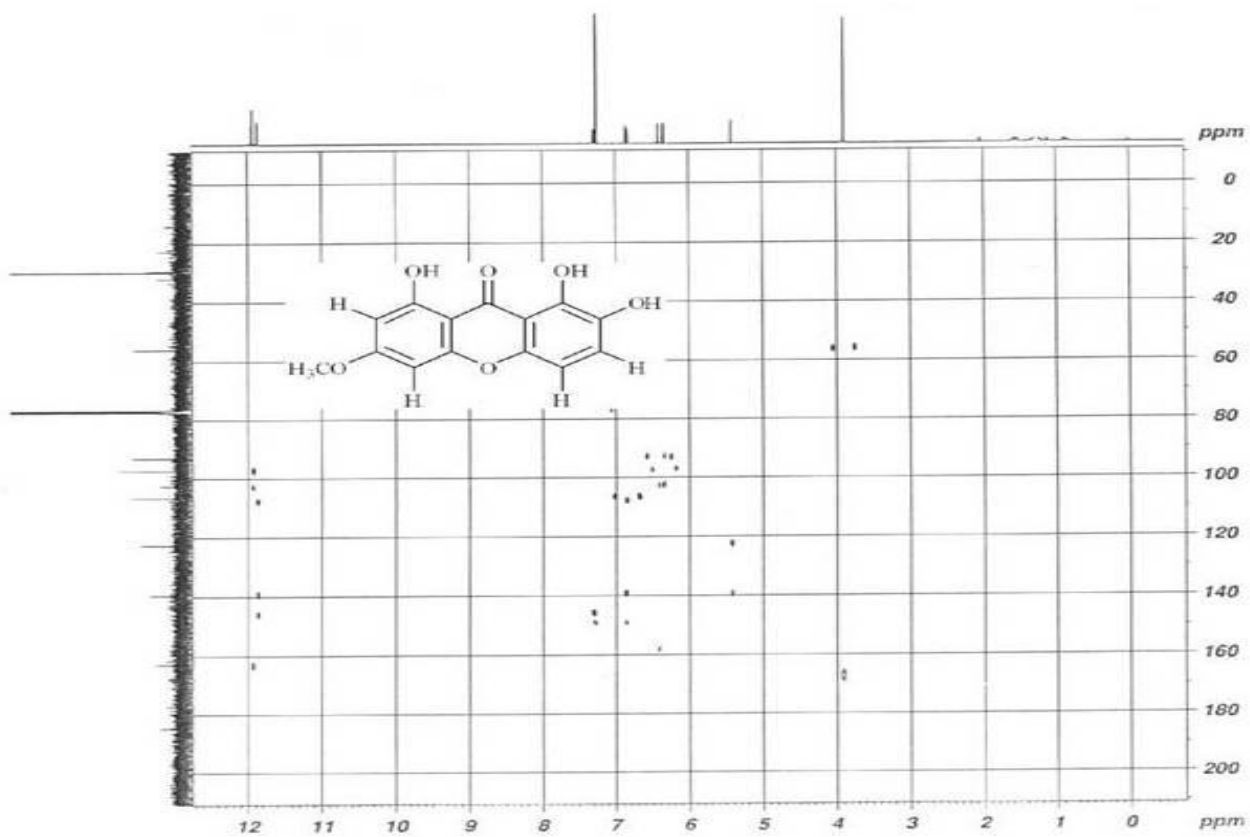

# MS spectra of swertianin

## National Centre for Mass Spectrometry Indian Institute of Chemical Technology

### Sample Information

Sample ID : SW1 Name: G MAHENDRAN, RESEARCH SCHOLAR, Dept OF BOTANY, BHARATHIYAR UNIVERS  
Data File : E:\ISO\18774-1.QGD  
Analyzed by : Admin  
Analyzed : 3/16/2009 6:19:43 PM  
Tuning File : C:\GCMSsolution\System\Tune1\Auto Tuning-EI(WithOut Column)- 3-3-09.qgt

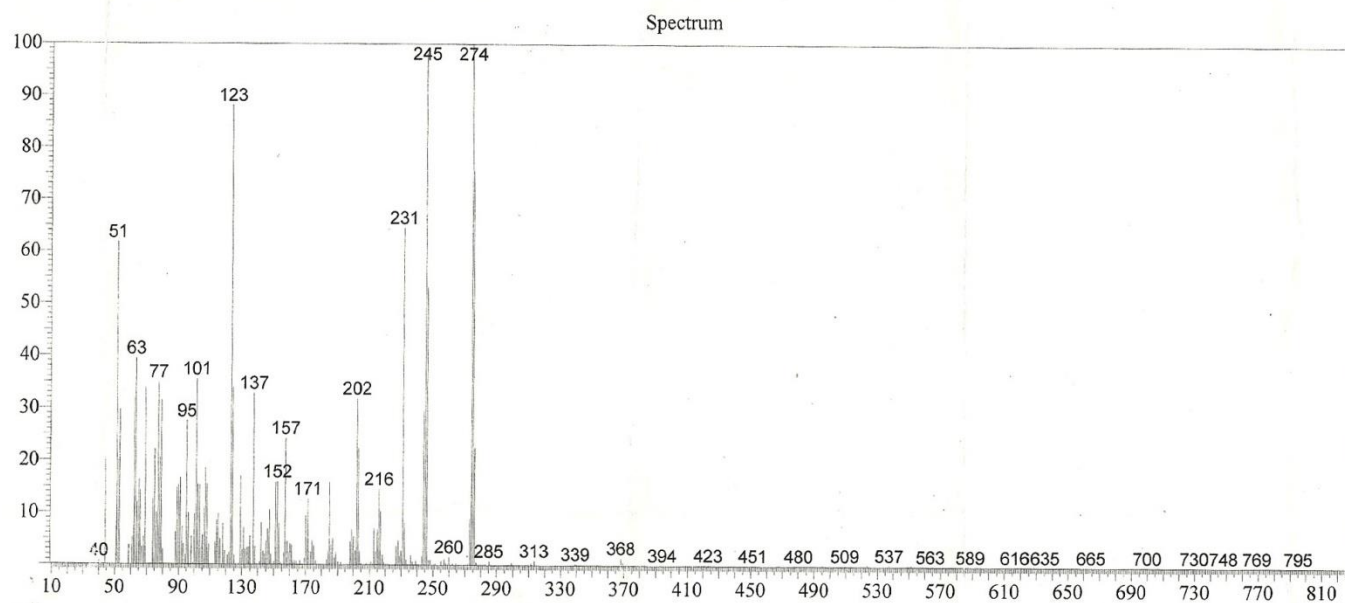

Compound 2 : Swertianin  
Melting point : 224–227 °C  
IR (KBr)  $\nu_{\max}$   $\text{cm}^{-1}$  : 3388-3442 (OH groups), 1662 (C=O), 1282 (O-CH<sub>3</sub>)  
<sup>1</sup>H NMR (300 MHz, CDCl<sub>3</sub>)  $\delta$  (ppm) : 3.90 (s, 3H, C<sub>6</sub>-OCH<sub>3</sub>) 5.44 (b s, 3H, C<sub>2</sub>-OH), 6.34 (d, 1H,  $J$  = 2.40 Hz, H-5) 6.41 (d, 1H,  $J$  = 2.40 Hz, H-7) 6.85 (d, 1H,  $J$  = 9.00 Hz, H-3), 7.30 (d, 1H,  $J$  = 9.00 Hz, H-4), 11.87 (s, 1H C<sub>8</sub>-OH) 11.94 (s, 1H C<sub>1</sub>-OH).  
<sup>13</sup>C NMR (75 MHz, CDCl<sub>3</sub>)  $\delta$  (ppm) : 60.69 (C<sub>6</sub>-OCH<sub>3</sub>), 97.33 (C<sub>4</sub>), 101.84 (C<sub>2</sub>), 106.89 (C<sub>9a</sub>), 110.77 (C<sub>5</sub>), 112.30 (C<sub>8a</sub>), 128.75 (C<sub>6</sub>), 145.23 (C<sub>10a</sub>), 152.01 (C<sub>4a</sub>), 153.28 (C<sub>7</sub>), 162.79 (C<sub>8</sub>), 167.27 (C<sub>1</sub>), 171.92 (C<sub>3</sub>), 189.51 (C=O).  
HMBC : H-3(C<sub>1</sub>, C<sub>4a</sub>), H-4(C<sub>2</sub>, C<sub>4a</sub>), H-5(C<sub>6</sub>), H-7(C<sub>5</sub>, C<sub>8</sub>, C<sub>8a</sub>), 1-OH(C<sub>9a</sub>), 2-OH(C<sub>3</sub>), 6-OCH<sub>3</sub>(C<sub>6</sub>).  
EIMS:  $m/z$ (%) : 274 (M<sup>+</sup>, 100 %) 260 (5 %), 246 (50 %), 245 (96 %), 231 (64 %), 216 (13 %), 202 (30 %) 185 (16 %), 171 (14 %), 157 (23 %), 152 (18 %), 137 (34 %), 123 (88 %), 101 (36 %), 98 (30 %), 77 (35 %), 63 (40 %), 51 (62 %). C<sub>14</sub>H<sub>10</sub>O<sub>6</sub> (274). Anal. Cal Found C: 61.46 %, H: 3.52 %.

1, 2, 8-Trihydroxy-6-methoxy xanthone (swertianin)

Bright yellow crystal, mp 224–227 °C, IR (cm<sup>-1</sup>): 3388-3442 (OH groups), 1662 (C=O), 1282 (O-CH<sub>3</sub>), EIMS m/z 274 [M]<sup>+</sup> (calculated for C<sub>14</sub>H<sub>10</sub>O<sub>6</sub>). <sup>1</sup>H NMR (CDCl<sub>3</sub>, 300MHz) 3.90 (s, 3H, C6-OCH<sub>3</sub>) 5.44 (b s, 3H, C2-OH), 6.34 (d, 1H, J = 2.40 Hz, H-5) 6.41 (d, 1H, J = 2.40 Hz, H-7) 6.85 (d, 1H, J = 9.00 Hz, H-3), 7.30 (d, 1H, J = 9.00 Hz, H-4), 11.87 (s, 1H C8-OH) 11.94 (s, 1H C1-OH). <sup>13</sup>C-NMR (CDCl<sub>3</sub>, 75MHz) 60.69 (C6-OCH<sub>3</sub>), 97.33 (C4), 101.84 (C2), 106.89 (C9a), 110.77 (C5), 112.30 (C8a), 128.75 (C6), 145.23 (C10a), 152.01 (C4a), 153.28 (C7), 162.79 (C8), 167.27 (C1), 171.92 (C3), 189.51 (C=O). HMBC: H-3(C1, C4a), H-4(C2, C4a), H-5(C6), H-7(C5, C8, C8a), 1-OH(C9a), 2-OH(C3), 6-OCH<sub>3</sub>(C6).
